# Supplementary material for: Processing and characterisation of BaZr0.8Y0.2O3−δproton conductor densified at 1200 °C
Source: Royal Society of Chemistry journal article supplement (doi:10.1039/d1ta09998a), 2022-01-01
Supplement: d1ta09998a1.pdf [file d1ta09998a1.pdf]

## Supplementary Information

### Processing and characterisation of $\text{BaZr}_{0.8}\text{Y}_{0.2}\text{O}_{3-\delta}$ proton conductor densified at 1200 °C

Ángel Triviño-Peláez<sup>a</sup>, Domingo Pérez-Coll<sup>a</sup>, Mario Aparicio<sup>a</sup>, Duncan P. Fagg<sup>b</sup>, Jadra Mosa<sup>a</sup>, Glenn C. Mather<sup>a\*</sup>

<sup>a</sup>Instituto de Cerámica y Vidrio (CSIC), Campus de Cantoblanco, 28049, Madrid, Spain

<sup>b</sup>Centre for Mechanical Technology and Automation, TEMA, University of Aveiro 3810 193 Aveiro, Portugal

Table S1. Selected lattice parameters of BZY20 prepared by sol gel after various thermal treatments refined from XRD data using  $\text{CaF}_2$  as an internal standard.

| Thermal treatment                                                                                                   | a (Å)       |
|---------------------------------------------------------------------------------------------------------------------|-------------|
| 750 °C for 4 hours                                                                                                  | 4.2035 (2)  |
| 1200 °C for 4 hours                                                                                                 | 4.20521 (4) |
| 1650 °C for 4 hours                                                                                                 | 4.21102 (5) |
| sintered at 1200 °C then exposed to dry 10% $\text{CO}_2$ :90% Ar then 10% $\text{H}_2$ :90% $\text{N}_2$ at 500 °C | 4.20758(4)  |
| sintered at 1200 °C then exposed to wet 10% $\text{CO}_2$ :90% Ar then 10% $\text{H}_2$ :90% $\text{N}_2$           | 4.19785(3)  |

Table S2. Structural parameters and agreement factors for BZY20, prepared by sol gel and sintered at 1200 or 1650 °C with Ba excess and ZnO sintering aid, obtained from XRD data.

|                                               | 1200°C ( $Pm\bar{3}m$ )                   | 1650°C ( $Pm\bar{3}m$ )                   |
|-----------------------------------------------|-------------------------------------------|-------------------------------------------|
| $a$ (Å)                                       | 4.20521                                   | 4.21102                                   |
| $V$ (Å <sup>3</sup> )                         | 74.364                                    | 74.673                                    |
| Ba position                                   | $\frac{1}{2}$ $\frac{1}{2}$ $\frac{1}{2}$ | $\frac{1}{2}$ $\frac{1}{2}$ $\frac{1}{2}$ |
| $U_{\text{iso}} \times 100$ (Å <sup>2</sup> ) | 1.51(3)                                   | 1.82 (4)                                  |
| Occ                                           | 1.0                                       | 1.0                                       |
| Zr/Y position                                 | 0 0 0                                     | 0 0 0                                     |
| $U_{\text{iso}} \times 100$ (Å <sup>2</sup> ) | 1.05 (4)                                  | 1.16(5)                                   |
| Occ                                           | 0.8/0.2                                   | 0.8/0.2                                   |
| O position                                    | $\frac{1}{2}$ 0 0                         | $\frac{1}{2}$ 0 0                         |
| $U_{\text{iso}} \times 100$ (Å <sup>2</sup> ) | 1.2(1)                                    | 2.0(2)                                    |
| Occ                                           | 2.9                                       | 2.9                                       |
| $\chi^2$                                      | 2.45                                      | 2.47                                      |
| $R_{\text{exp}}$                              | 5.67                                      | 6.36                                      |
| $R_{\text{wp}}$                               | 8.88                                      | 10.0                                      |
| $R_{\text{B,BZY}}$                            | 2.97                                      | 2.03                                      |

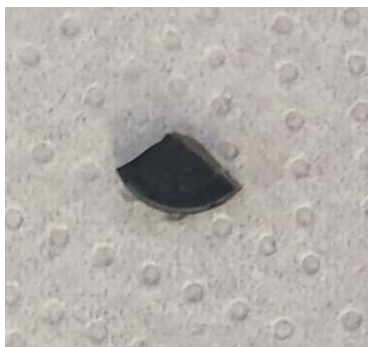

Fig. S1. Photographic image of pellet fracture exposed to laboratory air for 14 days.
